# Supplementary material for: Triggering inert desert sand toward a low-cost and efficient cocatalyst for photocatalytic hydrogen evolution reactions
Source: Royal Society of Chemistry journal article supplement (doi:10.1039/d4gc02895c), 2024-01-01
Supplement: d4gc02895c1.pdf [file d4gc02895c1.pdf]

## Electronic Supplementary Information for

### **Triggering inert desert sand toward a low-cost and efficient cocatalyst for photocatalytic hydrogen evolution reactions**

Junqing Wang<sup>abc</sup>, Fang Wang<sup>abc</sup>, Zhengguo Zhang<sup>abc</sup> and Shixiong Min<sup>\*abc</sup>

<sup>a</sup> School of Chemistry and Chemical Engineering, North Minzu University, Yinchuan, 750021, P. R. China.

<sup>b</sup> Ningxia Key Laboratory of Solar Chemical Conversion Technology, North Minzu University, Yinchuan, 750021, P. R. China.

<sup>c</sup> Key Laboratory of Chemical Engineering and Technology, State Ethnic Affairs Commission, North Minzu University, Yinchuan, 750021, P. R. China.

\*Corresponding author: [sxmin@nun.edu.cn](mailto:sxmin@nun.edu.cn)

**Table S1** Desert sand sampling sites in various regions of Ningxia

| Entry | Sampling point                                                                                      | Sample name | Altitude (m) | Fe content (wt.%) |
|-------|-----------------------------------------------------------------------------------------------------|-------------|--------------|-------------------|
| 1     | Ulan Buh Desert<br>(39°41.879N; 106°41.459E)                                                        | UBD         | 1065         | 1.43              |
| 2     | Yueliang Lake<br>(38°30.563N; 105°19.694E)                                                          | YLL         | 1282         | 1.52              |
| 3     | Shapotou Tourist Attraction<br>(37°26.641N; 105°57.250E)                                            | STA         | 1394         | 1.53              |
| 4     | Pingluo Yaofu Town<br>(38°44.334N; 106°30.22E)                                                      | PYF         | 1091         | 1.87              |
| 5     | Shanghai Miao Town<br>(38°20.955N; 106°35.076E)                                                     | SHM         | 1229         | 1.88              |
| 6     | Dawukou Binhe Avenue<br>(38°46.216N; 106°36.407E)                                                   | DBA         | 1091         | 1.99              |
| 7     | Ningxia Technical College of<br>Wine and Desertification<br>Prevention<br>(38°19.260N; 106°09.460E) | NTCWDP      | 1113         | 2.23              |
| 8     | Shahu Nature Reserve<br>(38°49.942N; 106°22.518E)                                                   | SHR         | 1091         | 2.36              |

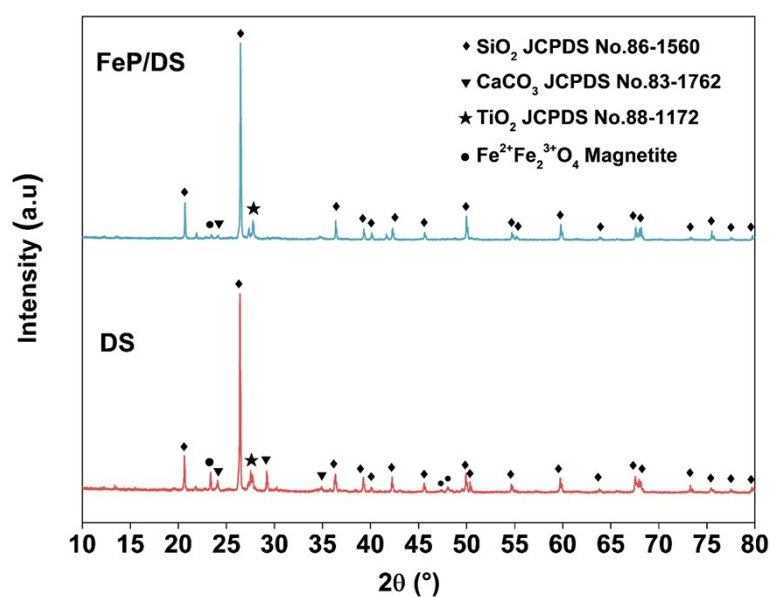

**Fig. S1** XRD patterns of DS and FeP/DS.

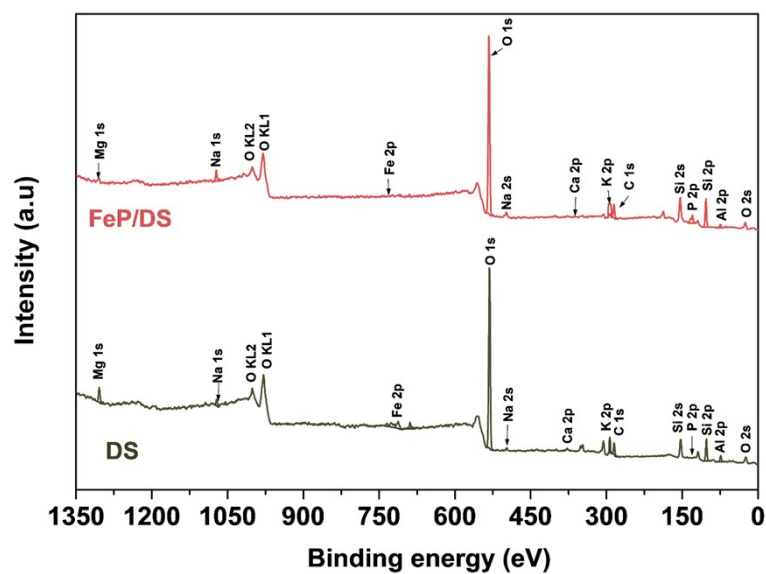

Fig. S2 XPS survey spectra of DS and FeP/DS.

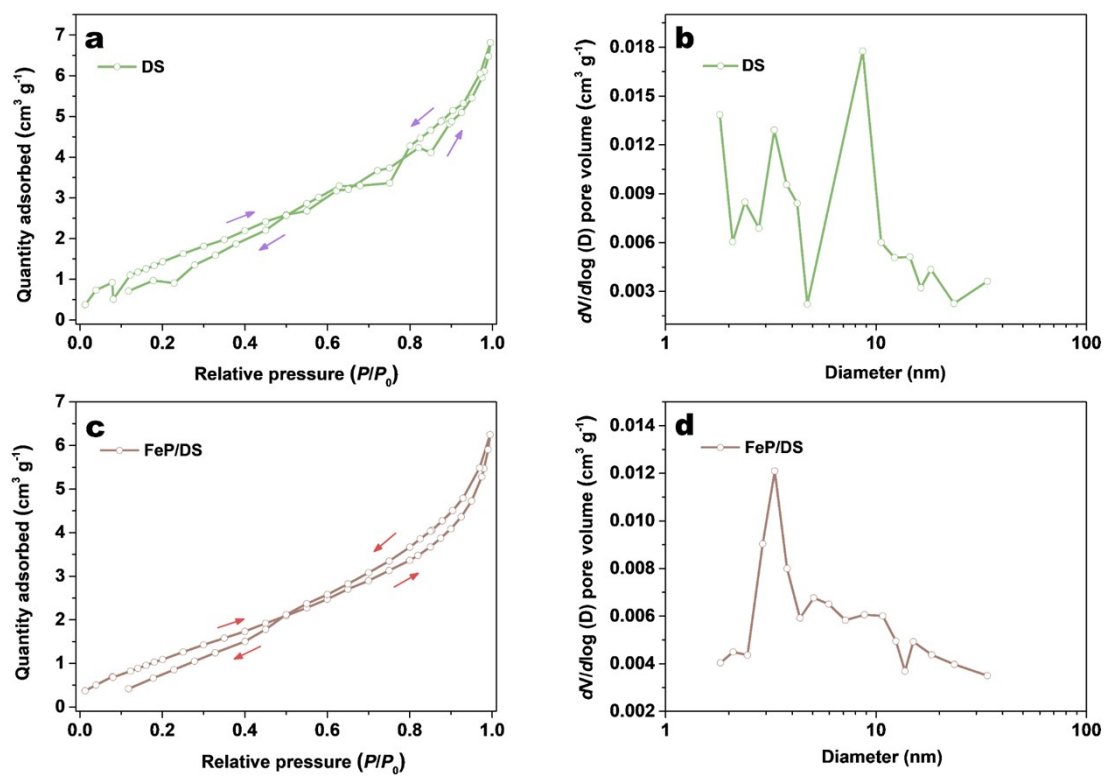

Fig. S3 (a)  $N_2$  adsorption-desorption isotherms and (b) the corresponding pore size distribution curves of DS. (c)  $N_2$  adsorption-desorption isotherms and (d) the corresponding pore size distribution curves of FeP/DS.

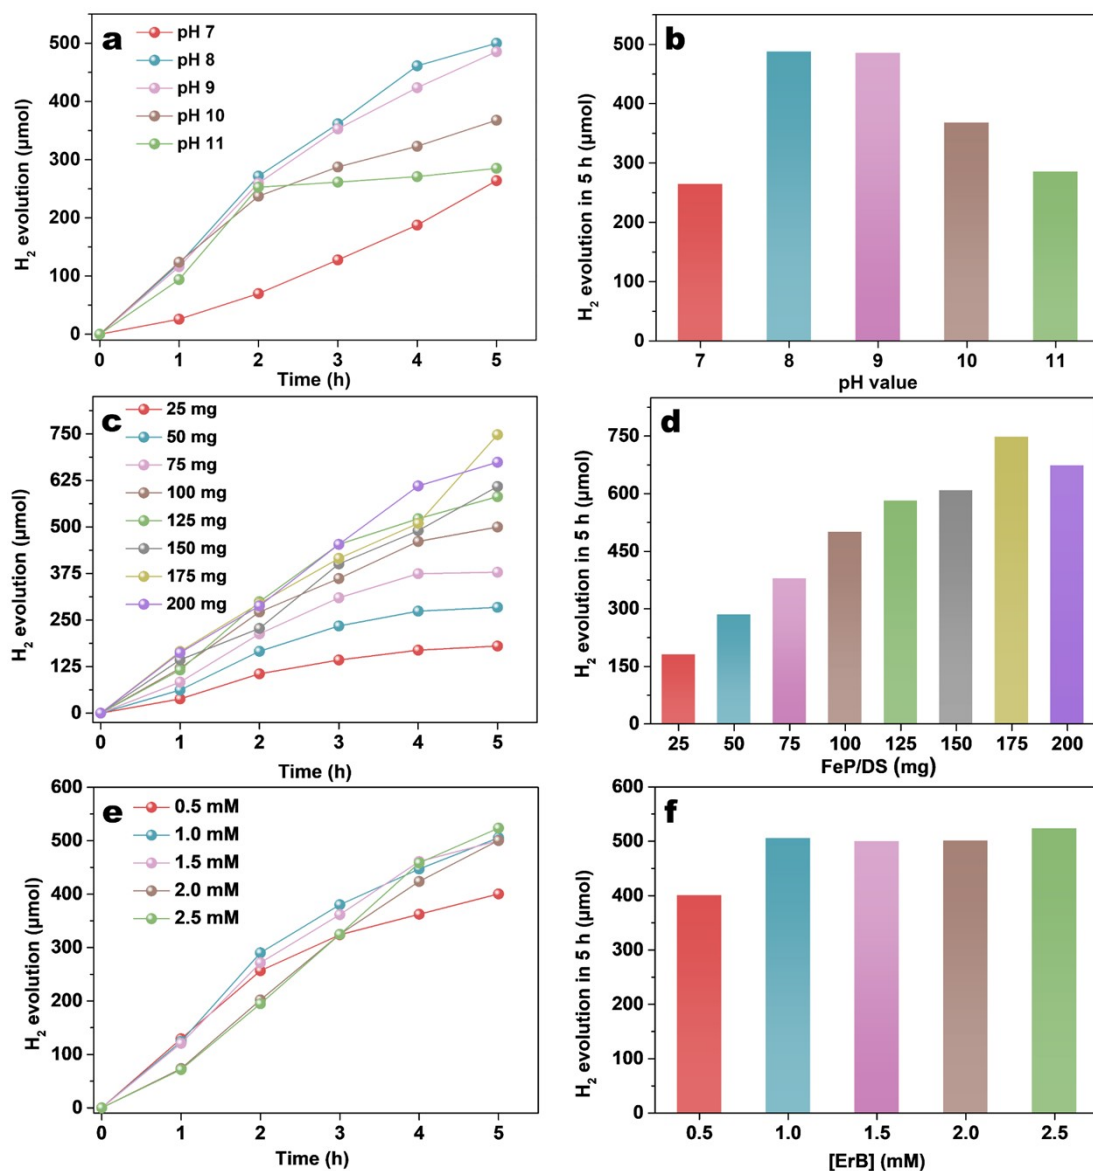

**Fig. S4** Photocatalytic H<sub>2</sub> evolution catalyzed by FeP/DS from ErB-TEOA system as a function of (a, b) pH value of TEOA solution, (c, d) FeP/DS concentration, and (e, f)

ErB concentration. Reaction conditions: light source, white LED lamp, 380

$\text{nm} \leq \lambda \leq 780 \text{ nm}$ ; TEOA solution, 25 mL, 10 vol%.

**Table S2** Comparison of the photocatalytic HER activity of FeP/DS cocatalyst in the dye-sensitized systems and when combined with CdS with previously reported Fe-P-based cocatalysts

| Entry | Catalysts                                                           | Photosensitizer | H <sub>2</sub> evolution rate ( $\mu\text{mol}\cdot\text{g}^{-1}\cdot\text{h}^{-1}$ ) | Light sources                                         | Sacrificial agents             | Ref.             |
|-------|---------------------------------------------------------------------|-----------------|---------------------------------------------------------------------------------------|-------------------------------------------------------|--------------------------------|------------------|
| 1     | NiTiO <sub>3</sub> /Fe <sub>2</sub> P                               | EY              | 5980                                                                                  | 5-W white LED lamp                                    | TEOA                           | 1                |
| 2     | MSI Pt-Fe <sub>2</sub> P                                            | EY              | 6000                                                                                  | 300-W Xe lamp ( $\lambda\geq 420$ nm)                 | TEOA                           | 2                |
| 3     | Fe <sub>2</sub> P/CGS                                               | ErB             | 810                                                                                   | 10-W white LED lamp (380 nm $\leq\lambda\leq$ 780 nm) | TEOA                           | 3                |
| 4     | Fe <sub>2</sub> P/ATP                                               | ErB             | 966                                                                                   | 10-W white LED lamp (380 nm $\leq\lambda\leq$ 780 nm) | TEOA                           | 4                |
| 5     | CDs/FeP                                                             | No              | 33.85                                                                                 | 100-W LED lamp (420 nm $\leq\lambda\leq$ 700 nm)      | Ultrapure water                | 5                |
| 6     | Cu <sub>2</sub> O/Fe <sub>2</sub> P/Ni <sub>3</sub> P               | No              | 108.68                                                                                | 300-W Xe lamp                                         | MeOH                           | 6                |
| 7     | FeP/TiO <sub>2</sub>                                                | No              | 190                                                                                   | 200W He (Xe) lamp                                     | MeOH                           | 7                |
| 8     | Fe <sub>2</sub> P/g-C <sub>3</sub> N <sub>4</sub>                   | No              | 214                                                                                   | 300-W Xe lamp ( $\lambda\geq 420$ nm)                 | TEOA                           | 8                |
| 9     | Fe <sub>2</sub> P-CO <sub>2</sub> P/g-C <sub>3</sub> N <sub>4</sub> | No              | 347                                                                                   | 300-W Xe lamp ( $\lambda=420$ nm)                     | TEOA                           | 9                |
| 10    | PCN/Fe <sub>2</sub> P/RP                                            | No              | 429                                                                                   | 300-W Xe lamp ( $\lambda\geq 420$ nm)                 | Ultrapure water                | 10               |
| 11    | GO/Fe <sub>2</sub> P/In <sub>2</sub> S <sub>3</sub>                 | No              | 485.92                                                                                | 10-W white LED lamp (400 nm $\leq\lambda\leq$ 700 nm) | ascorbic acid aqueous solution | 11               |
| 12    | PMCSFP                                                              | No              | 2937.11                                                                               | 300-W Xe lamp ( $\lambda\geq 420$ nm)                 | Lactic acid                    | 12               |
| 13    | FeP/DS                                                              | ErB             | 999.94                                                                                | 10-W white LED lamp (380 nm $\leq\lambda\leq$ 780 nm) | TEOA                           | <b>This work</b> |
| 14    | CdS-FeP/DS                                                          | No              | 2704.8                                                                                | 300-W Xe lamp ( $\lambda\geq 420$ nm)                 | Lactic acid                    | <b>This work</b> |

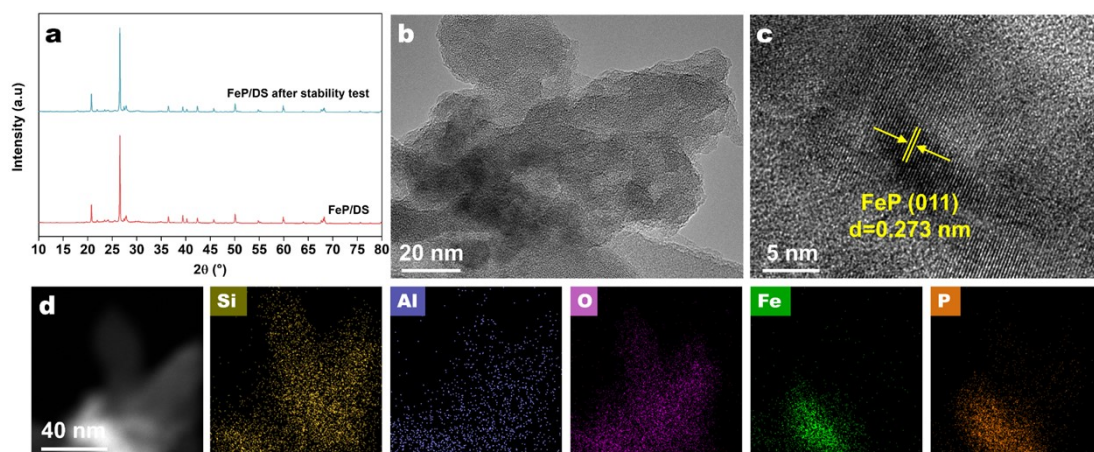

**Fig. S5** (a) XRD patterns of FeP/DS before and after stability test. (b) TEM, (c) HRTEM, (d) HAADF-STEM, and the corresponding EDX mapping images of FeP/DS after stability test.

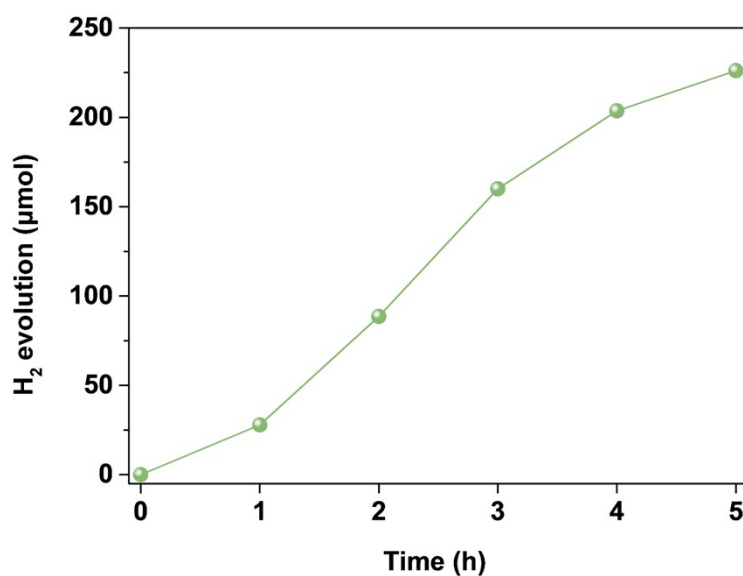

**Fig. S6** The HER activity of activated FeP/DS. Reaction conditions: light source, white LED lamp,  $380\text{ nm} \leq \lambda \leq 780\text{ nm}$ ; dye concentration: 1.5 mM; catalyst dosage: 100 mg; TEOA solution, 25 mL, 10 vol%, pH 8.

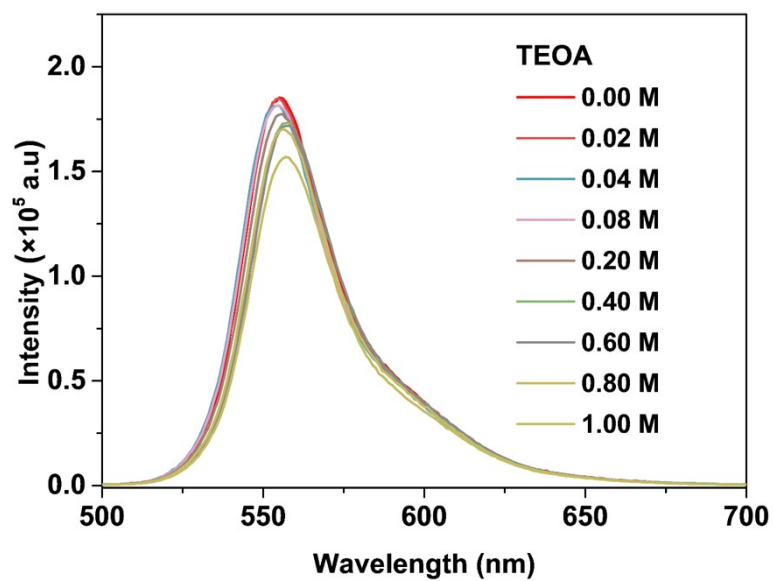

**Fig. S7** PL emission quenching of ErB solution (10 mM) with TEOA.

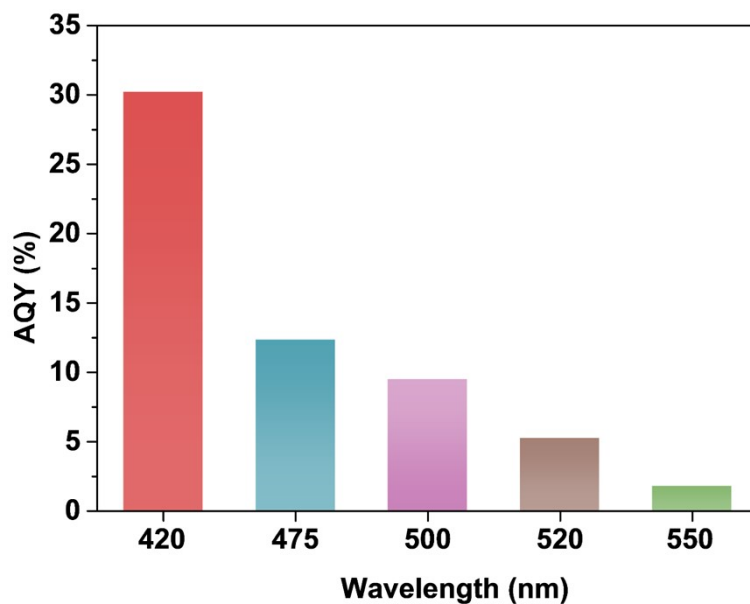

**Fig. S8** AQY of H<sub>2</sub> evolution over CdS-FeP/DS as a function of wavelength of incident light. Reaction conditions: CdS: 100 mg; FeP/DS: 10 mg; LA solution: 100 mL, 10 vol%.

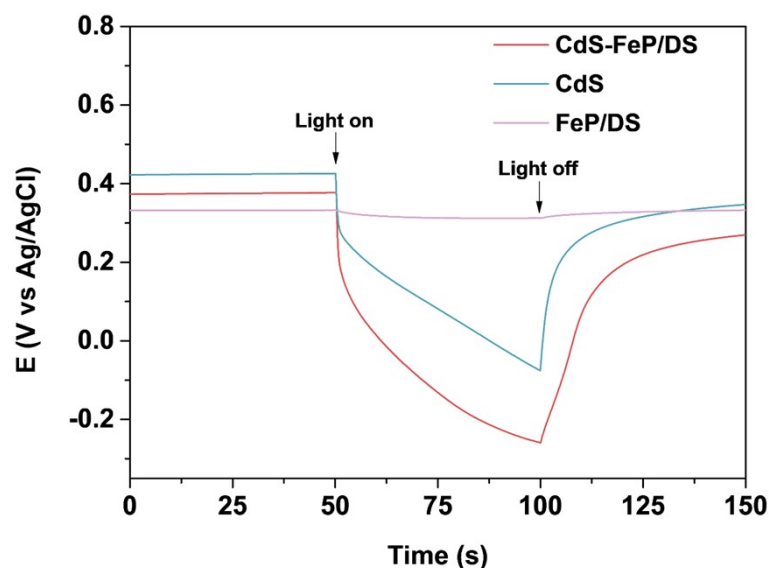

**Fig. S9** Transient open-circuit voltage curves of CdS-FeP/DS, CdS, and FeP/DS.

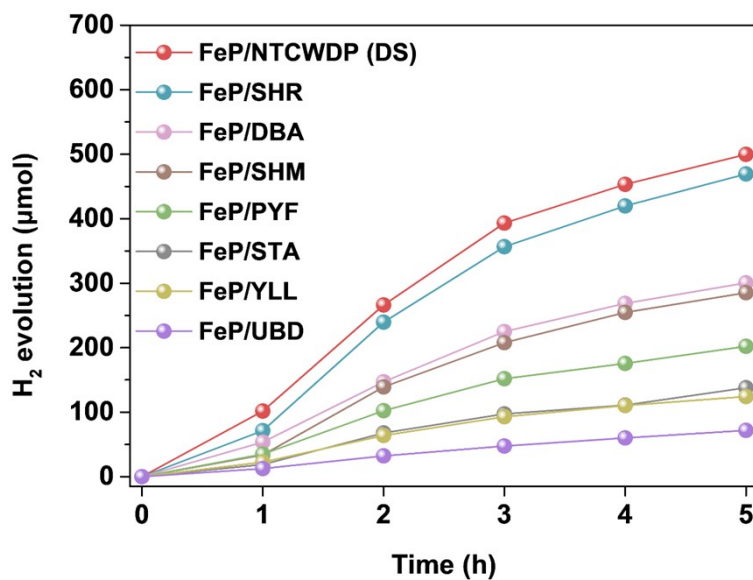

**Fig. S10** Time courses of H<sub>2</sub> evolution catalyzed by supported cocatalysts derived from different DS samples. Reaction conditions: light source: white LED lamp, 380 nm  $\leq \lambda \leq$  780 nm; [ErB]: 1.5 mM; cocatalyst dosage: 100 mg; TEOA solution: 25 mL, 10 vol%, pH 8.

### Supplementary references

1. H. Y. Li, H. M. Gong, X. Q. Hao, G. R. Wang and Z. L. Jin, *Renewable Energy*, 2022, **188**, 132-144.



2. A. M. Idris, S. Zheng, M. Zhang, X. Y. Jiang, G. C. Jiang, J. Wang, S. Li and Z. Q. Li, *Catal. Sci. Technol.*, 2023, **13**, 6456-6462.
3. F. Wang, K. L. Li, A. Anwar, Z. G. Zhang, W. X. Xu and S. X. Min, *Green Chem.*, 2023, **25**, 5865-5871.
4. F. Wang, H. H. Ma, F. M. Ren, Z. F. Zhou, Z. G. Zhang, W. B. Xu and S. X. Min, *Nanoscale*, 2023, **15**, 3366-3374.
5. H. L. Si, Z. Li, T. Y. Zhang, Z. L. Fan, H. Huang, Y. Liu and Z. H. Kang, *Appl. Surf. Sci.*, 2024, **649**, 159153.
6. S. Liu, J. X. Huang, H. W. Su, G. G. Tang, Q. Q. Liu, J. F. Sun and J. Xu, *Ceram.Int.*, 2021, **47**, 1414-1420.
7. J. F. Callejas, J. M. McEnaney, C. G. Read, J. C. Crompton, A. J. Biacchi, E. J. Popczun, T. R. Gordon, N. S. Lewis and R. E. Schaak, *ACS Nano*, 2014, **8**, 11101-11107.
8. Z. C. Sun, M. Fujitsuka, C. Shi, M. S. Zhu, A. J. Wang and T. Majima, *ChemPhotoChem*, 2019, **3**, 540-544.
9. L. H. Cheng, S. M. Xie, Y. J. Zou, D. D. Ma, D. K. Sun, Z. H. Li, Z. Y. Wang and J. W. Shi, *Int. J. Hydrogen Energy*, 2019, **44**, 4133-4142.
10. Muhammad Qasim, Maochang Liu and Liejin Guo, *Catal. Today*, 2023, **409**, 119-127.
11. X. Li, X. J. Lyu, X. H. Zhao, Y. Zhang, S. N. Akanyange, J. C. Crittenden, H. Q. Zhao and T. L. Jiang, *Int. J. Hydrogen Energy*, 2021, **46**, 18376-18390.
12. Y. Liu, J. W. Yan, D. M. Liu and L. Shi, *J. Alloy. Compd.*, 2023, **938**, 168545.
